# Supplementary material for: Inter/Intra-Observer Agreement in Video-Capsule Endoscopy: Are We Getting It All Wrong? A Systematic Review and Meta-Analysis
Source: MDPI journal article supplement (doi:10.3390/diagnostics12102400), 2022-10-02
Supplement: s1 [file s1]

## Supplementary Material

**Table S1:** search strings with PICO questions, Search string:

| Investigation                 | Outcome                       |
|-------------------------------|-------------------------------|
| Capsule camera*               | Interobserv*                  |
| Wireless camera*              | Intraobserv*                  |
| Wireless camera endoscop*     | Inter-observ*                 |
| WCE                           | Intra-observ*                 |
| CCE                           | Inter observ*                 |
| Colon capsule endoscop*       | Intra observ*                 |
| PillCam*                      | Interrater reliability/       |
| Pill Cam*                     | Observer variation [Mesh]     |
| Camera pill*                  | Observer agreement*           |
| Capsule endoscopy/            | Observer disagreement*        |
| Capsule endoscope/            | Observer Variations           |
| Capsule endoscop*             | Variation, Observer           |
| Endoscop*, Capsule            | Variations, Observer          |
| Wireless Capsule Endoscop*    | Bias, Observer                |
| Capsule Endoscop*, Wireless   | Observer Bias                 |
| Endoscop*, Wireless Capsule   | Interobserver Variation       |
| Video Capsule Endoscop*       | Interobserver Variations      |
| Capsule Endoscop*, Video      | Variation, Interobserver      |
| Capsule Endoscopy, Video      | Variations, Interobserver     |
| Endoscop*, Video Capsule      | Inter-Observer Variation      |
| Pan-enteric capsule endoscop* | Inter Observer Variation      |
| Capsule endoscopy [MeSH]      | Inter-Observer Variations     |
|                               | Variation, Inter-Observer     |
|                               | Variations, Inter-Observer    |
|                               | Interobserver Variability     |
|                               | Interobserver Variabilities   |
|                               | Variabilities, Interobserver  |
|                               | Variability, Interobserver    |
|                               | Inter-Observer Variability    |
|                               | Inter Observer Variability    |
|                               | Inter-Observer Variabilities  |
|                               | Variabilities, Inter-Observer |
|                               | Variability, Inter-Observer   |
|                               | Intraobserver Variation       |
|                               | Intraobserver Variations      |
|                               | Variation, Intraobserver      |
|                               | Variations, Intraobserver     |
|                               | Intra-Observer Variation      |
|                               | Intra Observer Variation      |
|                               | Intra-Observer Variations     |
|                               | Variation, Intra-Observer     |
|                               | Variations, Intra-Observer    |
|                               | Intraobserver Variability     |
|                               | Intraobserver Variabilities   |
|                               | Variabilities, Intraobserver  |
|                               | Variability, Intraobserver    |
|                               | Intra-Observer Variability    |

|  |                                                                                                                                                                                                                                                                                                                                                                                                                                                                    |
|--|--------------------------------------------------------------------------------------------------------------------------------------------------------------------------------------------------------------------------------------------------------------------------------------------------------------------------------------------------------------------------------------------------------------------------------------------------------------------|
|  | Intra Observer Variability<br>Intra-Observer Variabilities<br>Variabilities, Intra-Observer<br>Variability, Intra-Observer<br>Inter-observer agreement<br>Inter-observer concordance<br>Inter-observer reliability<br>Inter-rater agreement<br>Inter-rater concordance<br>Inter-rater reliability<br>Interobserver agreement<br>Interobserver concordance<br>Interobserver reliability<br>Interrater agreement<br>Interrater concordance<br>Interrater reliability |
|--|--------------------------------------------------------------------------------------------------------------------------------------------------------------------------------------------------------------------------------------------------------------------------------------------------------------------------------------------------------------------------------------------------------------------------------------------------------------------|

\* represents any group of characters including no character. / =subject heading Embase. MeSH = mesh term pubmed.

**Question:** What are the overall inter- and intra-observer agreements and variation in colon capsule endoscopy (CCE) reading?

P: Not applicable

I: colon capsule endoscopy

C: Not applicable

O: inter/intra-observer agreement
